# Supplementary material for: Redox and catalytic properties of biochar-coated zero-valent iron for the removal of nitro explosives and halogenated phenols
Source: Royal Society of Chemistry journal article supplement (doi:10.1039/c7em00035a), 2017-01-01
Supplement: c7em00035a1.pdf [file c7em00035a1.pdf]

Title: Reductive removal of nitro explosives and halogenated phenols with zero-valent iron-  
included biochar: The role of zero-valent iron and biochar

Authors: Seok-Young Oh<sup>a\*</sup>, Yong-Deuk Seo<sup>a</sup>, Kwang-Sun Ryu<sup>b</sup>, Da-Jeong Park<sup>b</sup>,  
Seung-Hun Lee<sup>b</sup>

<sup>a</sup>Department of Civil and Environmental Engineering, University of Ulsan, Ulsan 44610,  
South Korea

<sup>b</sup>Department of Chemistry, University of Ulsan, Ulsan 44610, South Korea

Electronic Supplementary Information

Number of pages: 3 (including a cover page)

Number of figures: 2

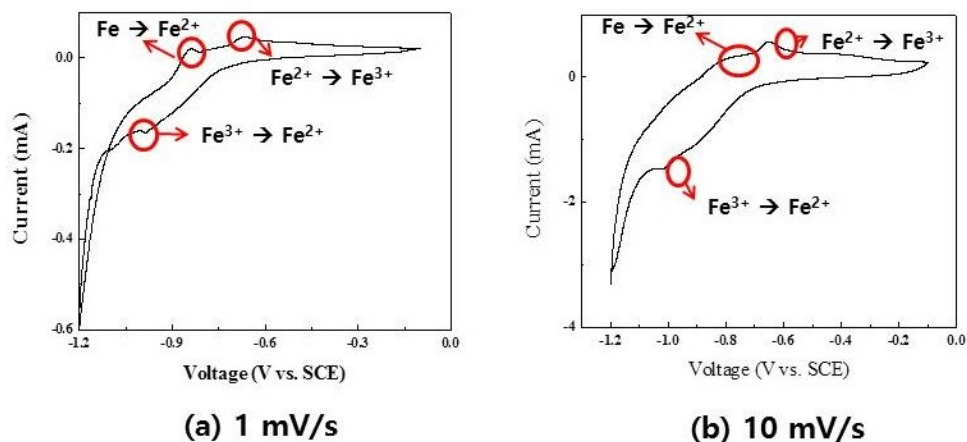

Fig. S1. Cyclic voltammograms of Fe(0)-included biochar at different scan rates ((a) 1mV/s and (b) 10 mV/s). Electrochemical measurements were carried out using an IVAMSTAT instrument with three electrode configuration. The working electrodes were prepared using 7:3 of active material and polytetrafluoroethylene (PTFE). The electrodes were formed and attached onto a nickel mesh. In the three electrode configuration, Fe(0)-included biochar (5 v% Fe) was used as the working electrode, saturated calomel electrode (SCE) was used as the reference electrode and platinum wire was employed as the counter electrode. 6.0 M KOH served as the electrolyte. The electrodes were determined at a potential range of -1.2 to -0.1 V.

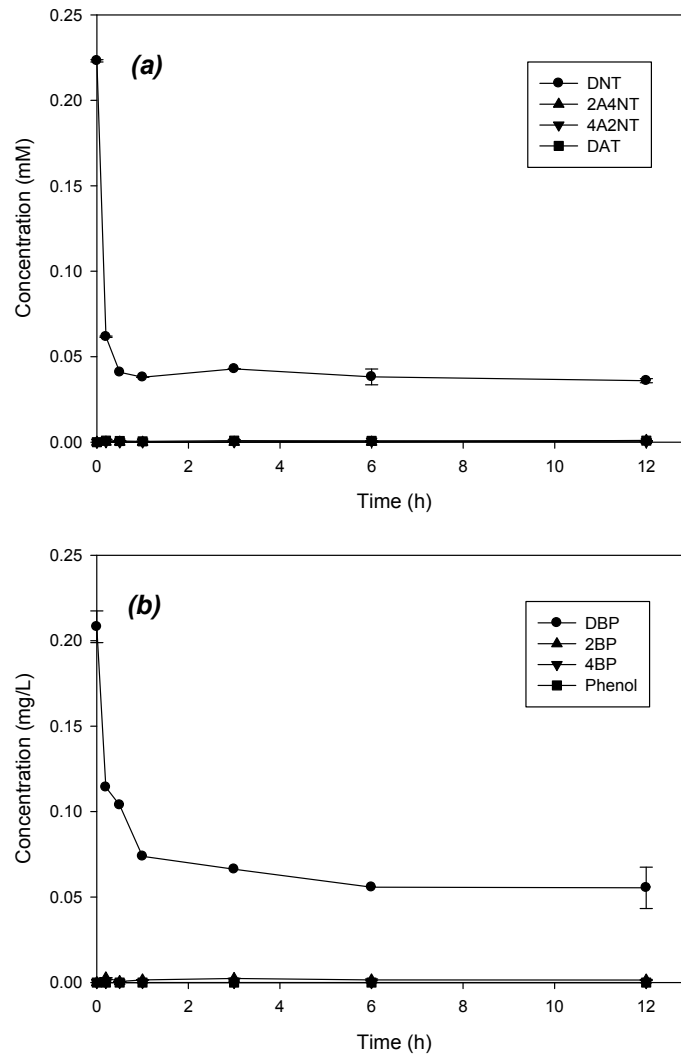

Fig. S2. Reduction of (a) DNT and (b) DBP by pre-reduced biochar by Fe(0). Data points are average values and the error bars represent one standard deviation. The biochar was pyrolyzed at 550 °C and pre-reduced by Fe(0) at a pH of 7.4 for 1 h.
